# Supplementary material
Source: Copernicus journal article supplement (doi:10.5194/bg-23-3059-2026)
Supplement: Supplementary file 1 [file bg-23-3059-2026-supplement.pdf]

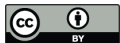

*Supplement of*

## **Living and nonliving particulate iron in the subtropical North Pacific Ocean**

**Eleanor S. Bates and Nicholas J. Hawco**

*Correspondence to:* Eleanor S. Bates ([esbates@hawaii.edu](mailto:esbates@hawaii.edu)) and Nicholas J. Hawco ([hawco@hawaii.edu](mailto:hawco@hawaii.edu))

The copyright of individual parts of the supplement might differ from the article licence.

**Supplemental Methods: Multiple linear regression of Fe uptake rates with *Prochlorococcus* and picoeukaryotes**

A multiple linear regression model of *Prochlorococcus* and picoeukaryotes (cells mL<sup>-1</sup>) with Fe uptake rates (pM d<sup>-1</sup>) was calculated using *fitlm* in MATLAB. The resulting model equation was:

$$\text{Fe uptake rate} = -63.959 + 0.00045 \text{ *Prochlorococcus* } + 0.039445 \text{ picoeukaryotes.} \quad (\text{Eq. S1})$$

The model had an R<sup>2</sup> of 0.89 and p values < 0.05 for the coefficients of *Prochlorococcus* and picoeukaryotes.

## Supplemental Figures and Tables

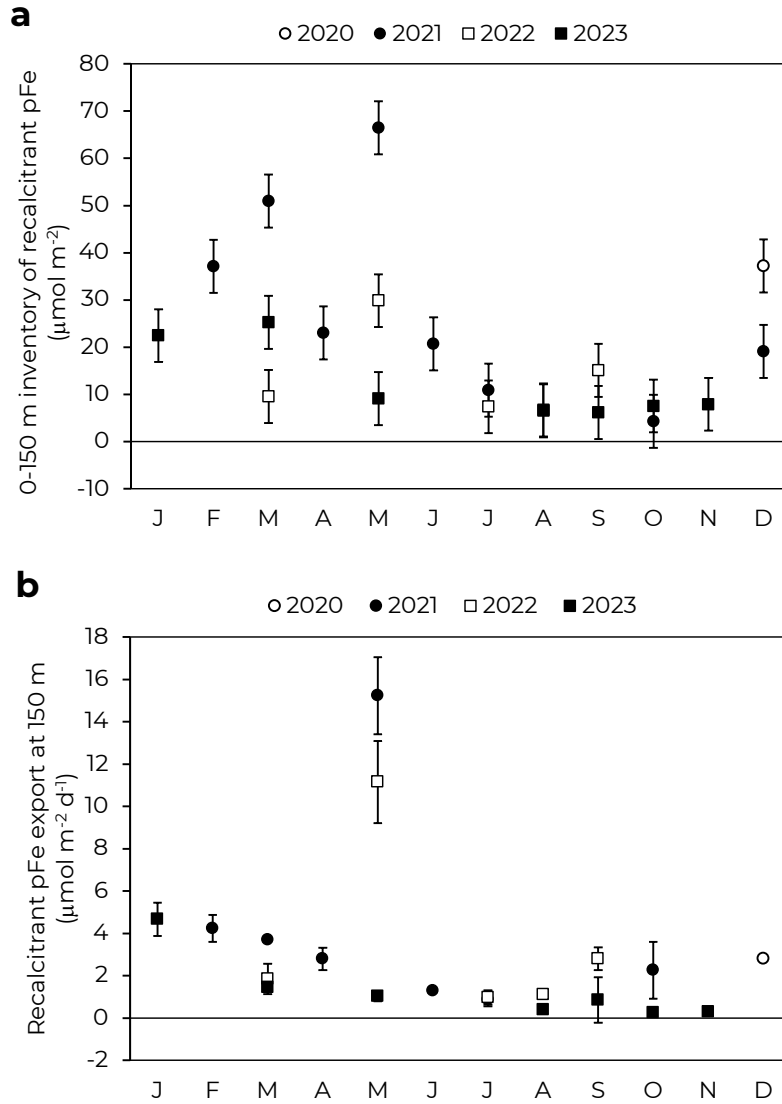

**Figure S1.** Seasonal and interannual variability in (a) 0-150 m inventory of lithogenic pFe and (b) export of recalcitrant pFe collected using sediment traps (Bates et al., 2025). Error bars in a represent uncertainty propagated from the standard deviation of multiple samples collected within the mixed layer. Error bars in b represent 1 standard deviation of 3 replicate sample traps

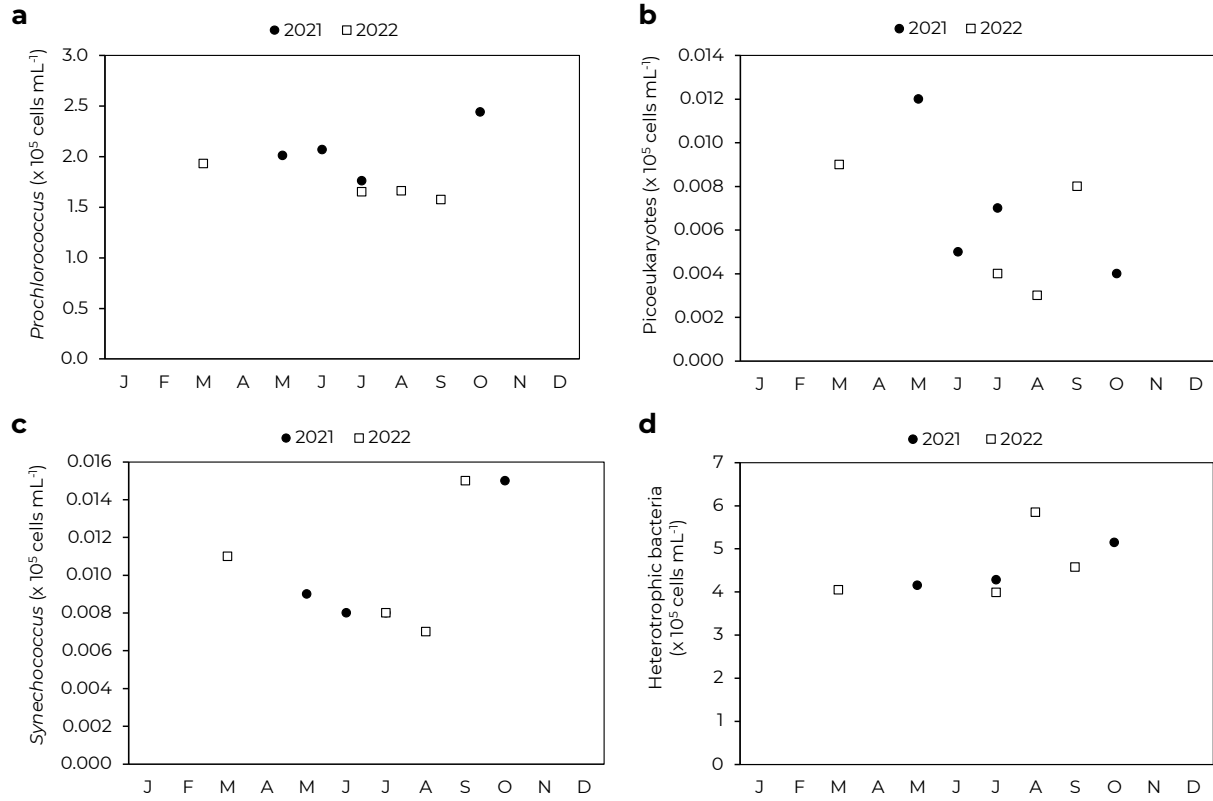

**Figure S2.** Cell counts for *Prochlorococcus* (a), picoeukaryotes (b), *Synechococcus* (c), and heterotrophic bacteria (d) at 25 m for cruises with Fe uptake data. Note these plots just include data for 2021-2022 for which flow cytometry data is available.

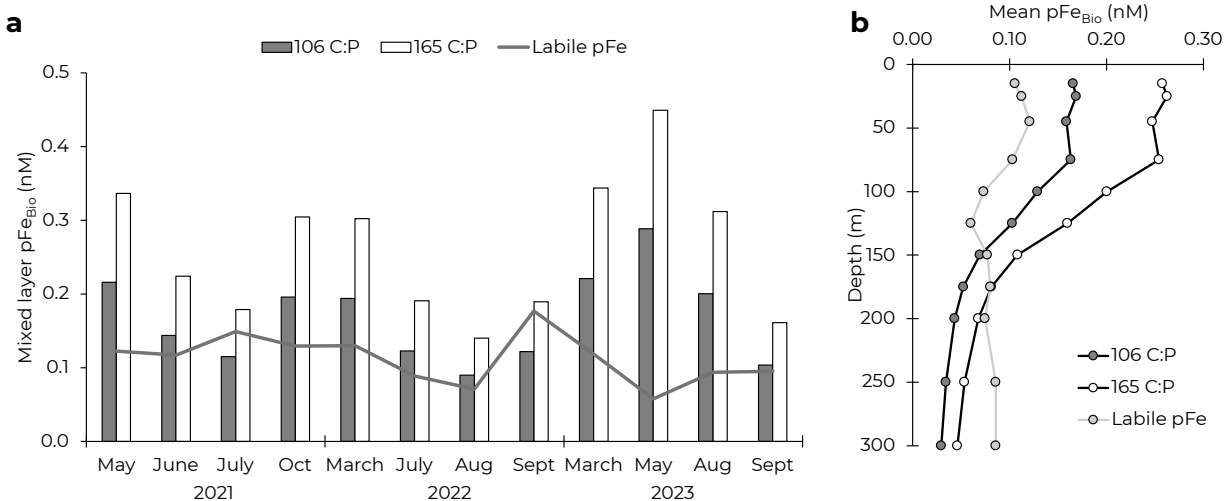

**Figure S3.** Particulate phosphorus approach to calculating  $pFe_{Bio}$  using the Redfield ratio of 106 C:P (Redfield, 1958). Note that while using the Redfield ratio results in better agreement with  $pFe_{Labile}$  than the C:P<sub>Phyto</sub> of 165 mol:mol, it still on average overestimates  $pFe_{Bio}$  compared to  $pFe_{Labile}$ . Additionally, dissolved and particulate organic matter pools at Station ALOHA have been shown to exceed the Redfield ratio due to relative phosphate depletion (Björkman et al., 2000; Karl et al., 2001).

**Table S1.** Correlations with Fe uptake rate at 25 m. Parameters in red showed a negative correlation with Fe uptake rates.

| Parameter (at 25 m)         | Correlation with Fe uptake rate (R <sup>2</sup> ) |
|-----------------------------|---------------------------------------------------|
| Dissolved Fe                | 0.03                                              |
| Fe:C                        | 0.92                                              |
| Heterotrophic bacteria*     | 0.15                                              |
| <i>Prochlorococcus</i> *    | 0.47                                              |
| <i>Synechococcus</i> *      | 0.09                                              |
| Picoeukaryotes*             | 0.41                                              |
| Primary production          | 0.26                                              |
| Particulate carbon          | 0.26                                              |
| Recalcitrant particulate Fe | 0.01                                              |
| Labile particulate Fe       | 0.09                                              |
| Total particulate Fe        | 0.03                                              |
| Dissolved organic carbon    | 0.33                                              |

\*Data not available for 2023

**Table S2.** Correlations with biogenic particulate Fe at 25 m. Parameters in red showed a negative correlation with Fe uptake rates.

| Parameter (at 25 m)                      | Correlation with Fe uptake rate (R <sup>2</sup> ) |
|------------------------------------------|---------------------------------------------------|
| Dissolved Fe                             | 0.12                                              |
| <b>Heterotrophic bacteria*</b>           | 0.03                                              |
| <i>Prochlorococcus</i> *                 | 0.61                                              |
| <i>Synechococcus</i> *                   | 0.22                                              |
| Picoeukaryotes*                          | 0.15                                              |
| Primary production                       | 0.19                                              |
| <b>Particulate carbon</b>                | 0.13                                              |
| Recalcitrant particulate Fe              | 0.00                                              |
| Labile particulate Fe                    | 0.25                                              |
| Total particulate Fe                     | 0.03                                              |
| <b>Dissolved organic carbon</b>          | 0.31                                              |
| <b>Fluorometric Chlorophyll <i>a</i></b> | 0.06                                              |
| HPLC Monovinyl Chlorophyll <i>a</i>      | 0.23                                              |
| <b>HPLC Divinyl Chlorophyll <i>a</i></b> | 0.09                                              |
| HPLC 19'-Butanoyloxyfucoxanthin          | 0.10                                              |
| HPLC Fucoxanthin                         | 0.02                                              |
| <b>HPLC 19'-hexanoyloxyfucoxanthin</b>   | 0.01                                              |
| HPLC Carotenes                           | 0.00                                              |

\*Data not available for 2023

**Table S3.** Correlations with labile nonliving particulate Fe at 25 m. Parameters in red showed a negative correlation with Fe uptake rates.

| Parameter (at 25 m)            | Labile nonliving particulate Fe (R <sup>2</sup> ) |
|--------------------------------|---------------------------------------------------|
| Dissolved Fe                   | 0.15                                              |
| <b>Fe uptake</b>               | 0.12                                              |
| Heterotrophic bacteria*        | 0.04                                              |
| <i>Prochlorococcus</i> *       | 0.04                                              |
| <i>Synechococcus</i> *         | 0.12                                              |
| Picoeukaryotes*                | 0.01                                              |
| Primary production             | 0.02                                              |
| <b>Particulate carbon</b>      | 0.01                                              |
| Recalcitrant particulate Fe    | 0.28                                              |
| Labile particulate Fe          | 0.53                                              |
| Total particulate Fe           | 0.47                                              |
| Dissolved organic carbon       | 0.11                                              |
| Recalcitrant particulate Al    | 0.19                                              |
| Recalcitrant particulate Ti    | 0.31                                              |
| <b>Recalcitrant pAl export</b> | 0.04                                              |
| Recalcitrant pTi export        | 0.02                                              |
| Recalcitrant pFe export        | 0.02                                              |
| Labile pFe export              | 0.00                                              |

\*Data not available for 2023

## References

Björkman, K., Thomson-Bulldis, A. L., and Karl, D. M.: Phosphorus dynamics in the North Pacific subtropical gyre, *Aquatic Microbial Ecology*, 22, 185–198, <https://doi.org/10.3354/ame022185>, 2000.

Karl, D. M., Björkman, K. M., Dore, J. E., Fujieki, L., Hebel, D. V., Houlihan, T., Letelier, R. M., and Tupas, L. M.: Ecological nitrogen-to-phosphorus stoichiometry at station ALOHA, *Deep Sea Research Part II: Topical Studies in Oceanography*, 48, 1529–1566, [https://doi.org/10.1016/S0967-0645\(00\)00152-1](https://doi.org/10.1016/S0967-0645(00)00152-1), 2001.

Redfield, A. C.: The biological control of chemical factors in the environment, *American Scientist*, 46, 205-222, 1958.
